# Supplementary material
Source: MDPI journal article supplement (https://www.mdpi.com/2673-8112/2/5/44)
Supplement: s1 [file s1]

| <b>Supplement Table S2. Accession Numbers for SARS-CoV genomes submitted to NCBI</b> |                         |                   |                         |
|--------------------------------------------------------------------------------------|-------------------------|-------------------|-------------------------|
| <b>Local Name</b>                                                                    | <b>Accession Number</b> | <b>Local Name</b> | <b>Accession Number</b> |
| ILRI_COVC14964                                                                       | OM738210                | ILRI_COVC24147    | OM738240                |
| ILRI_COVC15112                                                                       | OM738211                | ILRI_COVC24473    | OM738241                |
| ILRI_COVC15443                                                                       | OM738212                | ILRI_COVM00545    | OM738242                |
| ILRI_COVC15641                                                                       | OM738213                | ILRI_COVM00550    | OM738243                |
| ILRI_COVC15679                                                                       | OM738214                | ILRI_COVM00557    | OM738244                |
| ILRI_COVC16034                                                                       | OM738215                | ILRI_COVM00694    | OM738245                |
| ILRI_COVC16148                                                                       | OM738216                | ILRI_COVM01022    | OM738246                |
| ILRI_COVC16151                                                                       | OM738217                | ILRI_COVM01049    | OM738247                |
| ILRI_COVC16203                                                                       | OM738218                | ILRI_COVM01180    | OM738248                |
| ILRI_COVC17903                                                                       | OM738219                | ILRI_COVM01190    | OM738249                |
| ILRI_COVC17983                                                                       | OM738220                | ILRI_COVM01192    | OM738250                |
| ILRI_COVC18434                                                                       | OM738221                | ILRI_COVM01195    | OM738251                |
| ILRI_COVC18439                                                                       | OM738222                | ILRI_COVM01196    | OM738252                |
| ILRI_COVC18443                                                                       | OM738223                | ILRI_COVM01197    | OM738253                |
| ILRI_COVC18952                                                                       | OM738224                | ILRI_COVM01204    | OM738254                |
| ILRI_COVC19669                                                                       | OM738225                | ILRI_COVM01221    | OM738255                |
| ILRI_COVC19670                                                                       | OM738226                | ILRI_COVM01229    | OM738256                |
| ILRI_COVC19994                                                                       | OM738227                | ILRI_COVM01234    | OM738257                |
| ILRI_COVC20064                                                                       | OM738228                | ILRI_COVM01279    | OM738258                |
| ILRI_COVC20471                                                                       | OM738229                | ILRI_COVM01327    | OM738259                |
| ILRI_COVC20624                                                                       | OM738230                | ILRI_COVM01348    | OM738260                |
| ILRI_COVC20783                                                                       | OM738231                | ILRI_COVM01396    | OM738261                |
| ILRI_COVC20784                                                                       | OM738232                | ILRI_COVM01418    | OM738262                |
| ILRI_COVC20803                                                                       | OM738233                | ILRI_COVM01624    | OM738263                |
| ILRI_COVC21359                                                                       | OM738234                | ILRI_COVM01772    | OM738264                |
| ILRI_COVC22822                                                                       | OM738235                | ILRI_COVM00167    | OM738265                |
| ILRI_COVC23476                                                                       | OM738236                | ILRI_COVM00073    | OM738266                |
| ILRI_COVC23642                                                                       | OM738237                | ILRI_COVM00174    | OM738267                |
| ILRI_COVC23878                                                                       | OM738238                | ILRI_COVM00151    | OM738268                |
| ILRI_COVC23936                                                                       | OM738239                | ILRI_COVM00103    | OM738269                |
| ILRI_COVM00185                                                                       | OM738271                | ILRI_COVM00237    | OM738270                |
