# Supplementary material
Source: MDPI journal article supplement (https://www.mdpi.com/2673-8112/2/5/44)

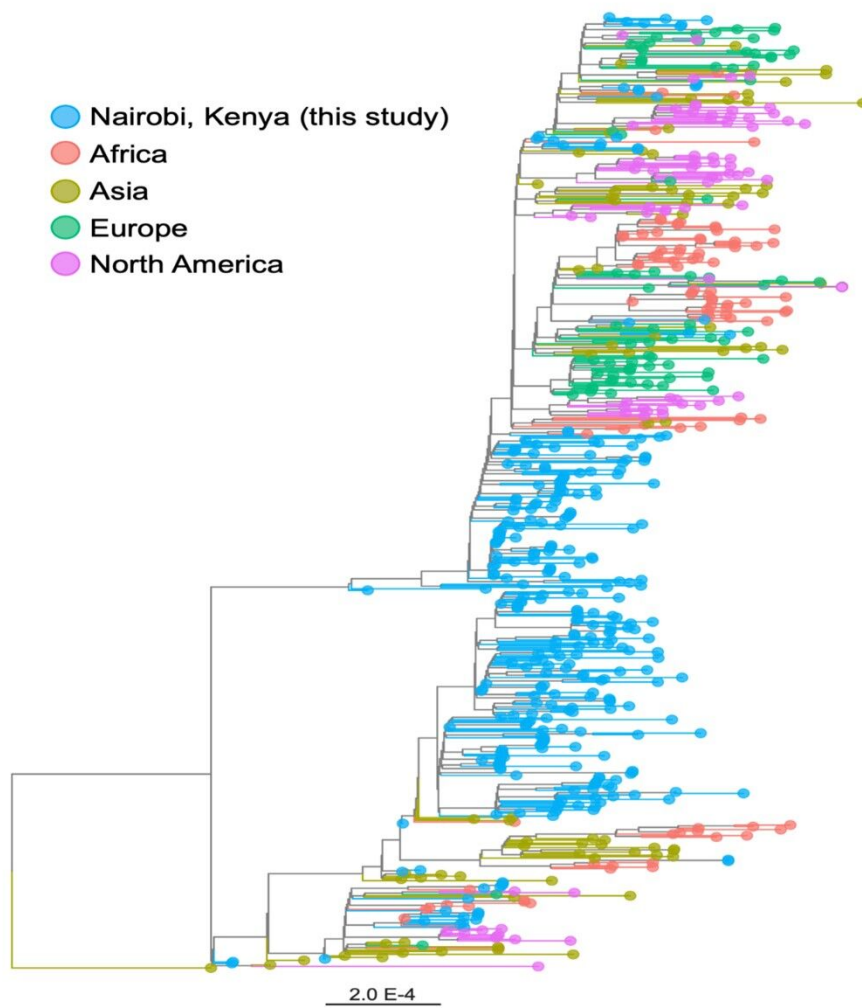

Supplement: s1 [file s1]
